# Supplementary material
Source: Springer Nature journal article supplement (https://www.springermedizin.de/resource/supplementary/12906_2012_1304_MOESM15_ESM.pdf/9522416)

**Bax****Bcl2**

A-I

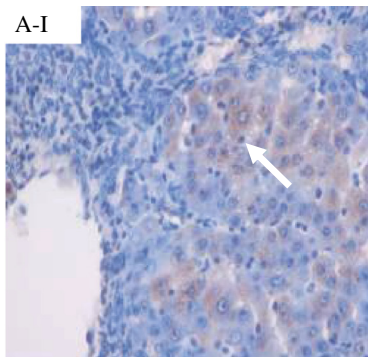

B-I

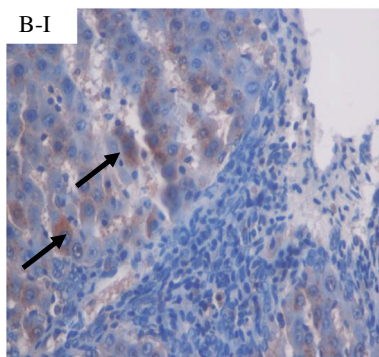

A-II

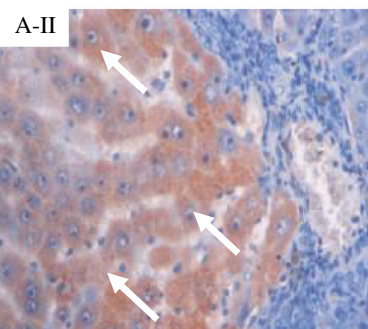

B-II

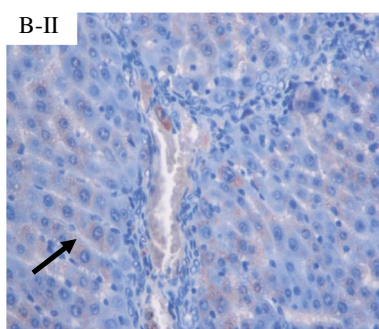

A-III

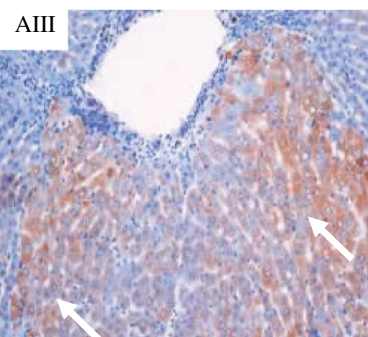

B-III

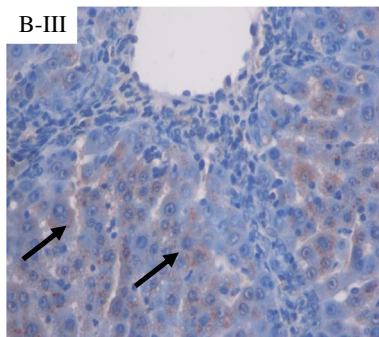

A-V

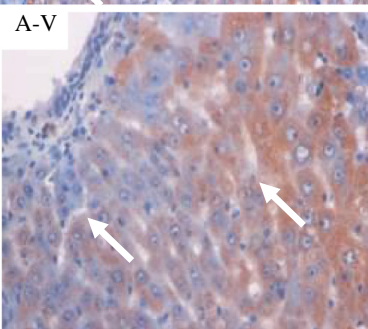

B-V

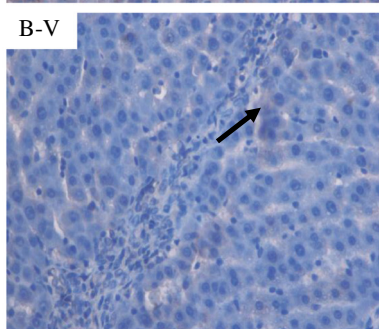

Supplement: MOESM15 [file 9522416]
